# Supplementary material for: H2A.Z Demarcates Intergenic Regions of the Plasmodium falciparum Epigenome That Are Dynamically Marked by H3K9ac and H3K4me3
Source: PubMed Central journal article supplement (PMC3002978; doi:10.1371/journal.ppat.1001223), 2010-12-16

A

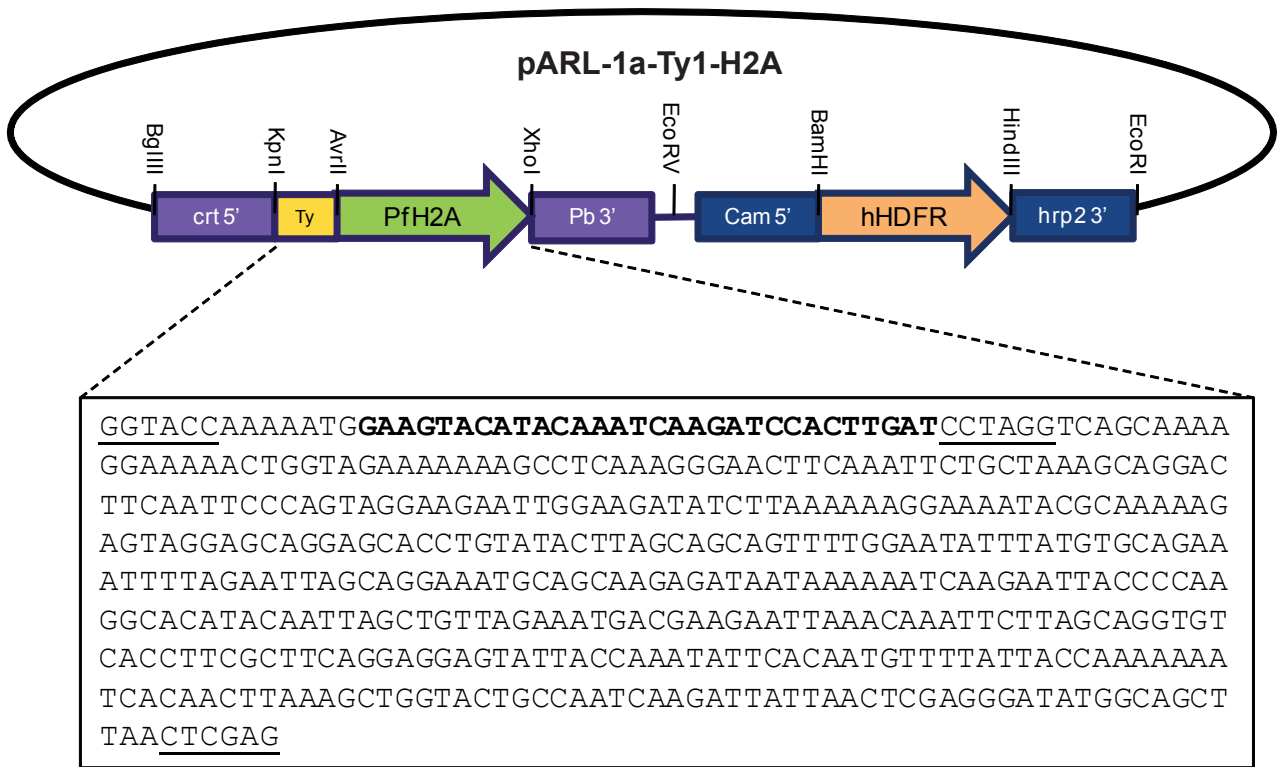

B

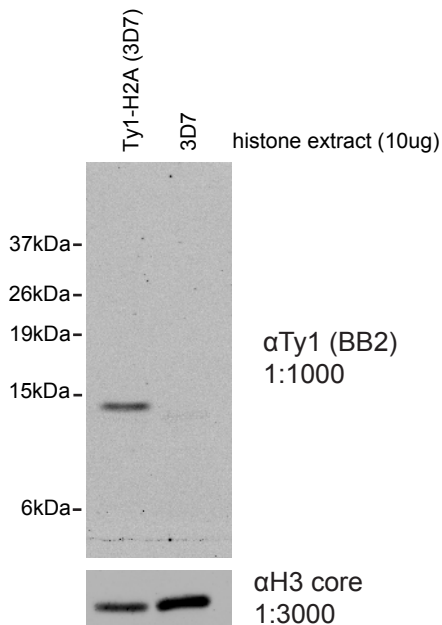

C

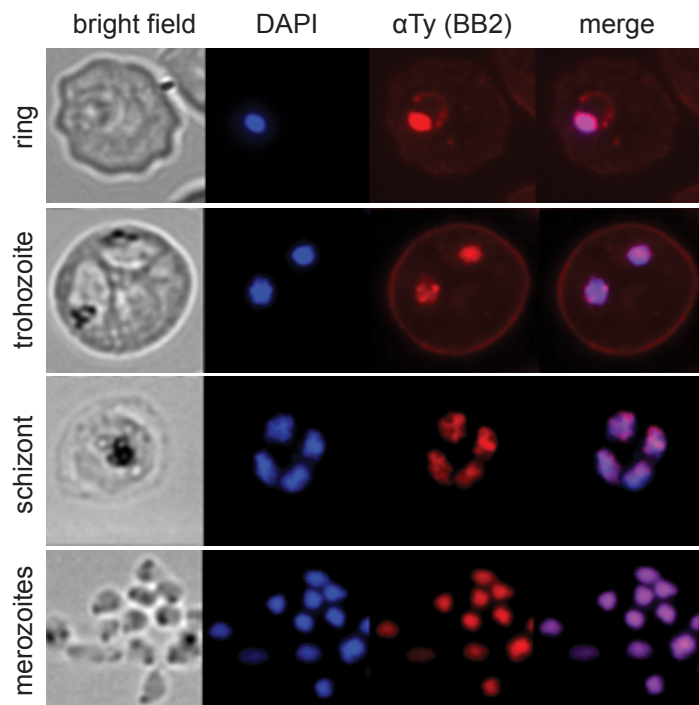

Supplement: ppat.1001223.s006.pdf [file ppat.1001223.s006.pdf]
